# Supplementary material for: Cells within cells: Rickettsiales and the obligate intracellular bacterial lifestyle
Source: Springer Nature journal article supplement (doi:10.1038/s41579-020-00507-2), 2021-02-09
Supplement: 41579_2020_507_MOESM1_ESM.pdf [file 41579_2020_507_MOESM1_ESM.pdf]

---

**Supplementary information**

---

**Cells within cells: Rickettsiales and the obligate intracellular bacterial lifestyle**

---

In the format provided by the authors and unedited

|                        | Organism                                          | Disease (human unless otherwise stated)         | Host cells in mammals     | Reservoir                                    | Vector                                                                             | Evidence of transovarian transmission | Currently known geographic distribution   | Genome size (Mbp) | Genome repeat (%) | Genome coding (intact proteins and RNA) (%) | Plasmids | Predicted CDS (genome + plasmid) | Hypothetical proteins | %GC (genome) |
|------------------------|---------------------------------------------------|-------------------------------------------------|---------------------------|----------------------------------------------|------------------------------------------------------------------------------------|---------------------------------------|-------------------------------------------|-------------------|-------------------|---------------------------------------------|----------|----------------------------------|-----------------------|--------------|
| <b>Anaplasmataceae</b> |                                                   |                                                 |                           |                                              |                                                                                    |                                       |                                           |                   |                   |                                             |          |                                  |                       |              |
|                        | <i>Anaplasma marginale</i> subsp. <i>centrale</i> | Bovine anaplasmosis                             | Erythrocytes              | Cattle, wild ruminants                       | <i>Rhicephalus</i> spp., <i>Amblyomma variegatum</i> (ticks)                       | no                                    | South America, Africa, Middle East        | 1.20              | -                 | -                                           | -        | 962                              | 207                   | 50.0         |
|                        | <i>Anaplasma marginale</i>                        | Bovine anaplasmosis                             | Erythrocytes              | Cattle, wild ruminants                       | <i>Rhicephalus microplus</i> , <i>Dermacentor</i> (ticks)                          | no                                    | Worldwide in tropical/subtropical regions | 1.20              | 5.6               | -                                           | -        | 961                              | 200                   | 49.8         |
|                        | <i>Anaplasma phagocytophilum</i>                  | Human granulocytotropic anaplasmosis            | Neutrophils               | Deer, rodents, ruminants, horses, dogs, cats | <i>Ixodes scapularis</i> , <i>Ixodes pacificus</i> , <i>Ixodes ricinus</i> (ticks) | no                                    | North America, Europe, Asia               | 1.48              | 12.7              | -                                           | -        | 1,110                            | 263                   | 41.6         |
|                        | <i>Candidatus Neoehrlichia mikurensis</i>         | Neoehrlichiosis                                 | n.d.                      | Mammals and birds                            | <i>I. ricinus</i> (ticks)                                                          | no                                    | Europe                                    | -                 | -                 | -                                           | -        | -                                | -                     | -            |
|                        | <i>Ehrlichia canis</i>                            | Canine monocytic ehrlichiosis                   | Monocytes and macrophages | Dogs                                         | <i>Rhicephalus sanguineus</i> (ticks)                                              | no                                    | Worldwide                                 | 1.31              | -                 | -                                           | -        | 967                              | 206                   | 29.0         |
|                        | <i>Ehrlichia chaffeensis</i>                      | Human monocytotropic ehrlichiosis               | Monocytes and macrophages | Deer, goats, dogs                            | <i>Amblyomma americanum</i> (ticks)                                                | no                                    | North America, Africa, Asia               | 1.18              | 3.8               | -                                           | -        | 934                              | 162                   | 30.1         |
|                        | <i>Ehrlichia ewingii</i>                          | Canine and human granulocytotropic ehrlichiosis | Neutrophils               | Dogs                                         | <i>A. americanum</i> (ticks)                                                       | no                                    | Worldwide                                 | -                 | -                 | -                                           | -        | -                                | -                     | -            |
|                        | <i>Ehrlichia muris euclairensis</i>               | Human ehrlichiosis                              | n.d.                      | unknown                                      | <i>I. scapularis</i> and <i>Peromyscus leucopus</i>                                | no                                    | Worldwide                                 | -                 | -                 | -                                           | -        | -                                | -                     | -            |
|                        | <i>Ehrlichia muris muris</i>                      | Human ehrlichiosis                              | n.d.                      | unknown                                      | <i>Ixodes scapularis</i> and <i>Peromyscus leucopus</i> (ticks)                    | no                                    | North America, possibly elsewhere         | 1.20              | -                 | -                                           | -        | 912                              | 160                   | 29.7         |
|                        | <i>Ehrlichia ruminantium</i>                      | Bovine heartwater or cowdriosis                 | Endothelial cells         | Ruminants                                    | <i>Amblyomma</i> spp. (ticks)                                                      | no                                    | Africa and Caribbean                      | 1.51              | -                 | -                                           | -        | 943                              | 193                   | 27.5         |
|                        | <i>Neorickettsia sennetsu</i>                     | Sennetsu fever and glandular fever              | Monocytes and macrophages | Fish                                         | unknown                                                                            | yes                                   | Asia                                      | 0.86              | 0.4               | -                                           | -        | 747                              | 127                   | 41.1         |
|                        | <i>Wolbachia pipientis</i> wMel                   | none known                                      | -                         | Arthropods                                   | NA                                                                                 | yes                                   | Worldwide                                 | 1.27              | 10.1              | 81                                          | -        | 1,245                            | 281                   | 35.2         |
|                        | <i>Wolbachia</i> sp. wBm                          | River blindness (via filarial nematode)         | -                         | Nematod <i>Brugia malayi</i>                 | NA                                                                                 | yes                                   | Worldwide in tropical/subtropical regions | 1.08              | 5.4               | 67.4                                        | -        | 990                              | 243                   | 34.2         |
| <b>Rickettsiaceae</b>  |                                                   |                                                 |                           |                                              |                                                                                    |                                       |                                           |                   |                   |                                             |          |                                  |                       |              |

|                     |                                     |                                                 |                                |                                      |                                                                                                                                                |     |                                        |      |      |    |   |       |     |      |
|---------------------|-------------------------------------|-------------------------------------------------|--------------------------------|--------------------------------------|------------------------------------------------------------------------------------------------------------------------------------------------|-----|----------------------------------------|------|------|----|---|-------|-----|------|
| Spotted fever group | <i>Rickettsia africanae</i>         | African tick bite fever                         | Endothelial cells              | <i>Amblyomma</i> ticks               | <i>Amblyomma hebraeum</i> and <i>A. variegatum</i> (ticks)                                                                                     | yes | Africa and the West Indies             | 1.28 | -    | -  | 1 | 2,055 | 414 | 32.4 |
|                     | <i>Rickettsia buchneri</i>          | none known                                      | n.d.                           | <i>Ixodes scapularis</i>             | <i>I. scapularis</i> (ticks)                                                                                                                   | yes | North America                          | 1.82 | 20   | 78 | 4 | 2,340 | 374 | 31.0 |
|                     | <i>Rickettsia conorii</i>           | Boutonneuse fever                               | Endothelial cells, macrophages | Dogs                                 | <i>R. sanguineus</i> , <i>Rhipicephalus pumilio</i> (ticks)                                                                                    | yes | Southern Europe, Africa, Southern Asia | 1.27 | 0.65 | 81 | - | 1,374 | 439 | 32.5 |
|                     | <i>Rickettsia hailongjiangensis</i> | Far eastern spotted fever                       | Endothelial cells              | Rodents                              | <i>Dysmicoccus sylvorum</i> (ticks)                                                                                                            | no  | Asia                                   | 1.28 | -    | -  | - | 1,504 | 447 | 32.3 |
|                     | <i>Rickettsia helvetica</i>         | Aneruptive fever*                               | n.d.                           | Rodents                              | <i>Dermacentor reticulatus</i> , <i>Ixodes</i> spp. (ticks)                                                                                    | yes | Asia                                   | 1.37 | -    | -  | 1 | 1,620 | 396 | 32.2 |
|                     | <i>Rickettsia honei</i>             | Flinders Island spotted fever, Thai tick typhus | n.d.                           | Rodents, reptiles                    | <i>B. hydrosauri</i> , <i>Ixodes</i> spp., <i>Hae. novaeguineae</i> (ticks)                                                                    | yes | Australia, Asia                        | 1.27 | -    | -  | - | 1,205 | 136 | 32.4 |
|                     | <i>Rickettsia japonica</i>          | Japanese spotted fever                          | n.d.                           | Rodents                              | <i>Haemophilus</i> spp., <i>Ixodes ovatus</i> , <i>Dermacentor taiwanensis</i> (ticks)                                                         | yes | Asia                                   | 1.28 | -    | -  | - | 1,502 | 449 | 32.4 |
|                     | <i>Rickettsia massiliae</i>         | Mediterranean spotted fever-like disease        | Endothelial cells              | unknown                              | <i>Rhipicephalus</i> spp., <i>I. ricinus</i> , <i>Haemaphysalis parvleachi</i> (ticks)                                                         | yes | Europe, Africa, USA                    | 1.28 | -    | -  | 1 | 1,495 | 399 | 32.6 |
|                     | <i>Rickettsia monacensis</i>        | Spotted fever                                   | n.d.                           | unknown                              | <i>Ixodes</i> spp. (ticks)                                                                                                                     | yes | Europe, North Africa                   | 1.35 | -    | -  | - | 1,560 | 288 | 32.4 |
|                     | <i>Rickettsia montanensis</i>       | limited reports of pathogenicity*               | n.d.                           | Lizards, possibly birds              | <i>Dermacentor</i> spp., <i>A. americanum</i> (ticks)                                                                                          | yes | North and Central America              | 1.28 | -    | -  | - | 1,425 | 387 | 32.6 |
|                     | <i>Rickettsia parkeri</i>           | Maculatum disease                               | Endothelial cells, macrophages | Dogs, cattle, <i>Amblyomma</i> ticks | <i>Amblyomma maculatum</i> , <i>Amblyomma triste</i> , <i>Dermacentor variabilis</i> (ticks)                                                   | yes | North and South America                | 1.30 | -    | -  | - | 1,477 | 426 | 32.4 |
|                     | <i>Rickettsia peacockii</i>         | none known                                      | NA                             | unknown                              | <i>Dermacentor andersoni</i> (ticks)                                                                                                           | yes | North and Central America              | 1.29 | -    | -  | 1 | 1,577 | 440 | 32.6 |
|                     | <i>Rickettsia raoultii</i>          | tick-borne lymphadenopathy (SENLAT)             | n.d.                           | unknown                              | <i>Dermacentor</i> spp., <i>I. ricinus</i> , <i>Haemaphysalis</i> spp., <i>Amblyomma testudinarium</i> (ticks)                                 | yes | Europe, Asia, North Africa             | 1.34 | -    | -  | 3 | 1,671 | 536 | 32.5 |
|                     | <i>Rickettsia rickettsii</i>        | Rocky Mountain spotted fever                    | Endothelial cells              | Rodents                              | <i>Dermacentor variabilis</i> , <i>D. andersoni</i> , <i>R. sanguineus</i> , <i>Amblyomma cajennense</i> , <i>Amblyomma aureolatum</i> (ticks) | yes | North and South America                | 1.3  | -    | -  | - | 1,567 | 438 | 32.5 |

|                    |                                       |                                               |                                                           |                          |                                                                                                                                                  |      |                                   |      |      |      |   |       |     |      |
|--------------------|---------------------------------------|-----------------------------------------------|-----------------------------------------------------------|--------------------------|--------------------------------------------------------------------------------------------------------------------------------------------------|------|-----------------------------------|------|------|------|---|-------|-----|------|
|                    | <i>Rickettsia sibirica</i>            | North Asian tick typhus, Siberian tick typhus | n.d.                                                      | Rodents                  | <i>Dermacentor</i> spp.,<br><i>R. sanguineus</i> ,<br><i>Ixodes persulcatus</i> ,<br><i>Hyalomma</i> spp.,<br><i>Rhizomucor pusillus</i> (ticks) | no   | Europe, Africa, Asia              | 1.25 | -    | -    | - | 1,464 | 431 | 32.5 |
|                    | <i>Rickettsia slovaca</i>             | tick-borne lymphadenopathy (SENLAT)           | n.d.                                                      | unknown                  | <i>Dermacentor</i> (ticks)                                                                                                                       | yes  | Europe, Asia, North Africa        | 1.28 | -    | -    | - | 1,523 | 464 | 32.5 |
|                    | <i>Rickettsia tamurae</i>             | spotted fever                                 | n.d.                                                      | unknown                  | <i>Ixodes</i> spp. (ticks)                                                                                                                       | no   | Asia                              | 1.45 | -    | -    | - | 1,664 | 518 | 32.5 |
| Typhus group       | <i>Rickettsia prowazekii</i>          | Epidemic typhus/Brill-Zinsser disease         | Endothelial cells                                         | Humans, flying squirrels | <i>Pediculus humanus humanus</i> (louse), flying squirrel ectoparasites                                                                          | no   | Worldwide                         | 1.11 | 0.3  | 76   | - | 872   | 99  | 29.1 |
|                    | <i>Rickettsia typhi</i>               | Murine typhus                                 | Endothelial cells                                         | Rats                     | <i>Xenopsylla cheopis</i> ,<br><i>Ctenocephalides felis</i> (fleas)                                                                              | no   | Worldwide                         | 1.11 | 0.29 | -    | - | 835   | 88  | 28.9 |
| Transitional group | <i>Rickettsia akari</i>               | Rickettsialpox                                | Endothelial cells, macrophages                            | Mice                     | <i>Liponyssoides sanguinus</i> (mite)                                                                                                            | yes  | North America, Asia, Europe       | 1.23 | -    | -    | - | 1,287 | 310 | 32.3 |
|                    | <i>Rickettsia australis</i>           | Queensland tick typhus                        | Endothelial cells                                         | unknown                  | <i>Ixodes holocyclus</i> ,<br><i>Ixodes tasmani</i> ,<br><i>Ixodes cornuatus</i> (ticks)                                                         | no   | Australia                         | 1.30 | -    | -    | 1 | 1,420 | 388 | 32.3 |
|                    | <i>Rickettsia felis</i>               | Flea-borne spotted fever*                     | n.d.                                                      | Fleas                    | <i>C. felis</i> (flea)                                                                                                                           | yes  | Worldwide                         | 1.59 | 4.3  | 83.6 | 2 | 1,721 | 451 | 32.5 |
| Ancestral group    | <i>Rickettsia bellii</i>              | none known                                    | NA                                                        | unknown                  | <i>Amblyomma</i> spp.,<br><i>Dermacentor</i> spp.,<br><i>Haemophysalis</i> spp., (ticks)                                                         | yes  | North and South America           | 1.53 | 3.7  | 85.2 | - | 1,566 | 372 | 31.7 |
|                    | <i>Rickettsia canadensis</i>          | none known                                    | NA                                                        | unknown                  | <i>Haemophysalis leporispalustris</i> (tick)                                                                                                     | no   | North and Central America         | 1.16 | -    | -    | - | 1,106 | 195 | 31.1 |
| Scrub typhus group | <i>Orientia tsutsugamushi</i>         | Scrub typhus                                  | Endothelial cells, dendritic cells, monocytes/macrophages | Trombiculid mites        | <i>Leptotrombidium</i> spp. (mites)                                                                                                              | yes  | Asia, Oceania, Northern Australia | 2.5  | 49   | -    | - | 2,578 | 469 | 30.8 |
|                    | <i>Candidatus Orientia chiloensis</i> | Scrub typhus                                  | n.d.                                                      | unknown                  | n.d.                                                                                                                                             | n.d. | Chil                              | -    | -    | -    | - | -     | -   | -    |
|                    | <i>Candidatus Orientia chuto</i>      | Scrub typhus                                  | n.d.                                                      | unknown                  | n.d.                                                                                                                                             | n.d. | United Arab Emirates              | -    | -    | -    | - | -     | -   | -    |

**Supplementary Table 1. Overview of disease, growth and genome characteristics of pathogenic Rickettsiales species or those important for human health.**

The information provided in this table relates to the following strains: *Anaplasma centrale* Str. Israel, *Anaplasma marginale* str. St. Maries, *Anaplasma phagocytophilum* str. HZ, *Ehrlichia canis* str. Jake, *Ehrlichia chaffeensis* str. Arkansas, *Ehrlichia muris muris* str. AS145, *Ehrlichia muris eauclairensis* Wisconsin, *Ehrlichia ruminatum* str. Welgevonden, *Neorickettsia sennetsu* str. Miyayama, *Wolbachia pipientis* wMel endosymbiont of *Drosophila melanogaster*, *Wolbachia* sp. wBm endosymbiont of *Brugia malayi* isolate TRS, *rickettsia africana* str. ESF-5, *Rickettsia buchneri* str. REIS, *Rickettsia conorii* str. Malish 7, *Rickettsia heilongjiangensis* str.

054, *Rickettsia helvetica* str. C9P9, *Rickettsia honei* str. RB, *Rickettsia japonica* str. YH, *Rickettsia massiliae* str. AZT80, *Rickettsia monacensis* str. IrR/Munich, *Rickettsia montanensis* str. OSU 85-930, *Rickettsia parkeri* str. Portsmouth, *Rickettsia peacockii* str Rustic, *Rickettsia raoultii* str. Khabarovsk, *Rickettsia rickettsii* str. Iowa, *Rickettsia sibirica* str. 246, *Rickettsia slovacica* str. 13-B, *Rickettsia tamurae* str. AT-1, *Rickettsia prowazekii* str. Madrid E, *Rickettsia typhi* str. Wilmington, *Rickettsia akari* str. Hartford, *Rickettsia australis* str. Cutlack, *Rickettsia felis* str. URRWXCal2, *Rickettsia bellii* str. RML369-C, *Rickettsia canadensis* str. McKiel, *Orientia tsutsugamushi* str. Karp, *Candidatus Orientia chuto* str. Dubai. \*pathogenicity in humans not confirmed. NA, not available; n.d., not determined; SENLAT, scalp eschar and neck lymphadenopathy after tick bite; CDS, coding DNA sequence. Table adapted from refs<sup>1-8</sup>

#### References:

- 1 Renvoisé, A., Merhej, V., Georgiades, K. & Raoult, D. Intracellular Rickettsiales: Insights into manipulators of eukaryotic cells. *Trends Mol Med* **17**, 573-583, doi:10.1016/j.molmed.2011.05.009 (2011).
- 2 Merhej, V. & Raoult, D. Rickettsial evolution in the light of comparative genomics. *Biol Rev Camb Philos Soc* **86**, 379-405, doi:10.1111/j.1469-185X.2010.00151.x (2011).
- 3 Uchiyama, T. Tropism and pathogenicity of rickettsiae. *Front Microbiol* **3**, 230, doi:10.3389/fmicb.2012.00230 (2012).
- 4 Walker, D. & Ismail, N. Emerging and re-emerging rickettsioses: endothelial cell infection and early disease events. *Nat Rev Microbiol* **6**, 375-386, doi:10.1038/nrmicro1866 (2008).
- 5 Nicholson, W. & Paddock, C. in *Yellow Book* (eds Centers for Disease Control and Prevention, GW Brunette, & JB Nemhauser) (Oxford University Press, 2020).
- 6 Sahni, S., Narra, H., Sahni, A. & Walker, D. Recent molecular insights into rickettsial pathogenesis and immunity. *Future Microbiol* **8**, 1265-1288, doi:10.2217/fmb.13.102 (2013).
- 7 Foster, J. *et al.* The Wolbachia genome of *Brugia malayi*: endosymbiont evolution within a human pathogenic nematode. *PLoS Biol* **3**, e121, doi:10.1371/journal.pbio.0030121 (2005).
- 8 Parola, P. *et al.* Update on tick-borne rickettsioses around the world: a geographic approach. *Clin Microbiol Rev* **26**, 657-702, doi:10.1128/CMR.00032-13 (2013).

| Organism                         | Surface protein | Protein family                                                                           | Described role                                                                                              | Antigenic variation                                                                                                                                                                                               | Reference |
|----------------------------------|-----------------|------------------------------------------------------------------------------------------|-------------------------------------------------------------------------------------------------------------|-------------------------------------------------------------------------------------------------------------------------------------------------------------------------------------------------------------------|-----------|
| <i>Anaplasma marginale</i>       | MSP1a, MSP1b    | MSP1                                                                                     | Surface antigen                                                                                             | MSP1a: single copy gene with strain-specific differences in tandem repeats, MSP1b: possible recombination between 5 pseudogenes                                                                                   | 1         |
|                                  | MSP2            | Outer membrane porin (pfam01617, superfamily d21487)                                     | Surface antigen                                                                                             | Recombination using donor DNA from ~5-7 pseudogenes (strain St. Maries) into a hyper variable region leads to antigenic variation and immune evasion. Alternating expression with MSP3 confers further variation. | 1         |
|                                  | MSP3            | Outer membrane porin (pfam01617, superfamily d21487)                                     | Surface antigen                                                                                             | Recombination using donor DNA from ~5-7 pseudogenes (strain St. Maries) into a hyper variable region leads to antigenic variation and immune evasion. Alternating expression with MSP2 confers further variation. | 1         |
|                                  | MSP4            | Outer membrane porin (pfam01617, superfamily d21487)                                     | Surface antigen                                                                                             | -                                                                                                                                                                                                                 | 2         |
|                                  | MSP5            | Outer membrane porin (pfam01617, superfamily d21487)                                     | Surface antigen                                                                                             | -                                                                                                                                                                                                                 | 2         |
|                                  | OmpA            | OmpA (pfam00691, superfamily d30079)                                                     | Adhesin, unknown receptor                                                                                   | -                                                                                                                                                                                                                 | 3         |
| <i>Anaplasma phagocytophilum</i> | AipA            | Unknown                                                                                  | Required for invasion, unknown receptor                                                                     | -                                                                                                                                                                                                                 | 4         |
|                                  | Asp14           | Unknown                                                                                  | Required for invasion, but not adhesion. Binds to protein disulfide isomerase                               | -                                                                                                                                                                                                                 | 5         |
|                                  | HSP70           | HSP70                                                                                    | Adhesin                                                                                                     | -                                                                                                                                                                                                                 | 6         |
|                                  | MSP2 (P44)      | Outer membrane porin (pfam01617, superfamily d21487)                                     | Major surface antigen, role in adhesion to host cells, unknown receptor                                     | Recombination using donor DNA from ~100 pseudogenes (strain HZ) into a hyper variable region leads to antigenic variation and immune evasion.                                                                     | 5         |
|                                  | MSP4            | Outer membrane porin (pfam01617, superfamily d21487)                                     | Adhesin                                                                                                     | -                                                                                                                                                                                                                 | 6         |
|                                  | OmpA            | OmpA (pfam00691, superfamily d30079)                                                     | Adhesin, binds to sialyl Lewis x-capped P-selectin glycoprotein ligand-1                                    | -                                                                                                                                                                                                                 | 7         |
| <i>Ehrlichia chaffeensis</i>     | EtpE (ECH1038)  | Unknown                                                                                  | Adhesin and invasin, binds to DNaseX, also involved in inhibition of reactive oxygen species in macrophages | -                                                                                                                                                                                                                 | 8,9       |
|                                  | OmpA            | OmpA (pfam00691, superfamily d30079)                                                     | Possible adhesin                                                                                            | -                                                                                                                                                                                                                 | 10        |
|                                  | P28 (OMP-1)     | Outer membrane porin (pfam01617, superfamily d21487)                                     | Surface antigen                                                                                             | Differential expression of multiple P28 genes arranged in tandem array                                                                                                                                            | 11        |
|                                  | TRP32           | Type 1 secreted tandem repeat proteins similar to repeats-in-toxin family of exoproteins | Secreted and surface exposed protein. Surface antigen, effector protein                                     | -                                                                                                                                                                                                                 | 12        |
|                                  | TRP47           | Type 1 secreted tandem repeat proteins similar to repeats-in-toxin family of exoproteins | Secreted and surface exposed protein. Surface antigen, effector protein                                     | -                                                                                                                                                                                                                 | 13        |
|                                  | TRP120          | Type 1 secreted tandem repeat proteins similar to repeats-in-toxin family of exoproteins | Secreted and surface exposed protein. Adhesin. Surface antigen, effector protein                            | -                                                                                                                                                                                                                 | 14        |
| <i>Wolbachia pipientis</i> wMel  | WSP             | Outer membrane porin (pfam01617, superfamily d21487)                                     | Surface antigen, role in adhesion to host cells                                                             | Variation in hypervariable region driven by mutations and intra- and inter-genic recombination                                                                                                                    | 15        |

|                                                                                                               |                                            |                                                                     |                                                                                                                         |                                                                                                |       |
|---------------------------------------------------------------------------------------------------------------|--------------------------------------------|---------------------------------------------------------------------|-------------------------------------------------------------------------------------------------------------------------|------------------------------------------------------------------------------------------------|-------|
| <i>Wolbachia</i> wBm                                                                                          | WSP                                        | Outer membrane porin (pfam01617, superfamily d21487)                | Surface antigen, role in adhesion to host cells                                                                         | Variation in hypervariable region driven by mutations and intra- and inter-genic recombination | 5     |
| <i>Rickettsia conorii</i> /<br><i>Rickettsia rickettsii</i> / <i>Rickettsia parkeri</i> (spotted fever group) | Adr1                                       | Predicted beta barrel protein                                       | Adhesin                                                                                                                 | -                                                                                              | 16    |
|                                                                                                               | Adr2                                       | Predicted beta barrel protein                                       | Adhesin                                                                                                                 | -                                                                                              | 16    |
|                                                                                                               | RickA                                      | Contains WH2 (Wiscott-Aldrich homology region 2) domain (pfam02205) | Arp 2/3-mediated actin-based motility (short tails, slow movement)                                                      | -                                                                                              | 17    |
|                                                                                                               | ScaO (rOmpA)                               | Surface cell antigen family of autotransporters (pfam03797)         | Role in adhesion to host cells and entry. Binds to integrin and fibroblast growth factor receptor 1                     | -                                                                                              | 18,19 |
|                                                                                                               | Sca1                                       | Surface cell antigen family of autotransporters (pfam03797)         | Role in adhesion to host cells                                                                                          | -                                                                                              | 18,19 |
|                                                                                                               | Sca2                                       | Surface cell antigen family of autotransporters (pfam03797)         | Actin polymerization (long tails, fast movement) and escape from cytoplasm. Role in adhesion to host cells and invasion | -                                                                                              | 18,19 |
|                                                                                                               | Sca4                                       | Surface cell antigen family of autotransporters (pfam03797)         | Vinculin binding and cell to cell transfer of bacteria (no autotransporter domain)                                      | -                                                                                              | 18,19 |
|                                                                                                               | Sca5 (rOmpB)                               | Surface cell antigen family of autotransporters (pfam03797)         | Role in adhesion to host cells and entry. Receptor is Ku70.                                                             | -                                                                                              | 18,19 |
| <i>Rickettsia typhi</i> / <i>Rickettsia prowazekii</i> (typhus group)                                         | Adr1                                       | Predicted beta barrel protein                                       | Adhesin                                                                                                                 | -                                                                                              | 16    |
|                                                                                                               | Adr2                                       | Predicted beta barrel protein                                       | Adhesin                                                                                                                 | -                                                                                              | 16    |
|                                                                                                               | Sca1 (pseudogene in <i>R. prowazekii</i> ) | Surface cell antigen family of autotransporters (pfam03797)         | Role in adhesion to host cells and entry                                                                                | -                                                                                              | 18    |
|                                                                                                               | Sca2                                       | Surface cell antigen family of autotransporters (pfam03797)         | Role in adhesion to host cells and entry                                                                                | -                                                                                              | 18    |
|                                                                                                               | Sca4                                       | Surface cell antigen family of autotransporters (pfam03797)         | Vinculin binding and cell to cell transfer of bacteria (no autotransporter domain)                                      | -                                                                                              | 18    |
|                                                                                                               | Sca5 (rOmpB)                               | Surface cell antigen family of autotransporters (pfam03797)         | Role in adhesion to host cells and entry. Receptor is Ku70.                                                             | -                                                                                              | 18    |
| <i>Orientia tsutsugamushi</i>                                                                                 | ScaA                                       | Surface cell antigen family of autotransporters (pfam03797)         | Surface antigen                                                                                                         | -                                                                                              | 20    |
|                                                                                                               | ScaB (only some strains)                   | Surface cell antigen family of autotransporters (pfam03797)         | Unknown                                                                                                                 | -                                                                                              | 20    |
|                                                                                                               | ScaC                                       | Surface cell antigen family of autotransporters (pfam03797)         | Adhesin. surface antigen                                                                                                | -                                                                                              | 20    |
|                                                                                                               | ScaD                                       | Surface cell antigen family of autotransporters (pfam03797)         | Unknown                                                                                                                 | -                                                                                              | 20    |
|                                                                                                               | ScaE                                       | Surface cell antigen family of autotransporters (pfam03797)         | Unknown                                                                                                                 | -                                                                                              | 20    |
|                                                                                                               | TSA22                                      | Unknown                                                             | Surface antigen                                                                                                         | -                                                                                              | 21    |
|                                                                                                               | TSA47 (HtrA)                               | Peptidase domain (pfam13365) and PDZ domain (pfam13180)             | Surface antigen. Role in budding exit from host cells                                                                   | -                                                                                              | 21    |

|  |       |                                                           |                                                                                       |                                                                                                                  |    |
|--|-------|-----------------------------------------------------------|---------------------------------------------------------------------------------------|------------------------------------------------------------------------------------------------------------------|----|
|  | TSA56 | Unique to <i>Orientia</i> , unknown structure (pfam03249) | Surface antigen. Role in adhesion to host cells and entry. Interacts with fibronectin | Variation in 4 hypervariable regions driven by mutations and intragenic recombination between distinct genotypes | 22 |
|--|-------|-----------------------------------------------------------|---------------------------------------------------------------------------------------|------------------------------------------------------------------------------------------------------------------|----|

**Supplementary Table 2. Summary of major surface proteins in Rickettsiales.** This table summarizes the best characterized surface proteins in selected Rickettsiales species, showing the protein family (where known), the described role of the surface protein, and any described antigenic variation.

**References:**

- 1 Brayton, K. *et al.* Complete genome sequencing of *Anaplasma marginale* reveals that the surface is skewed to two superfamilies of outer membrane proteins. *Proc Natl Acad Sci U S A* **102**, 844-849, doi:10.1073/pnas.0406656102 (2005).
- 2 Molad, T., Brayton, K., Palmer, G., Michaeli, S. & Shkap, V. Molecular conservation of MSP4 and MSP5 in *Anaplasma marginale* and *A. centrale* vaccine strain. *Vet Microbiol* **100**, 55-64, doi:10.1016/j.vetmic.2004.01.018 (2004).
- 3 Hebert, K. *et al.* *Anaplasma marginale* Outer Membrane Protein A Is an Adhesin That Recognizes Sialylated and Fucosylated Glycans and Functionally Depends on an Essential Binding Domain. *Infect Immun* **85**, doi:10.1128/IAI.00968-16 (2017).
- 4 Seidman, D. *et al.* in *Cell Microbiol* Vol. 16(8) 1133-1145 (2014).
- 5 Truchan, H., Seidman, D. & Carlyon, J. Breaking in and grabbing a meal: *Anaplasma phagocytophilum* cellular invasion, nutrient acquisition, and promising tools for their study. *Microbes Infect*, doi:10.1016/j.micinf.2013.10.010 (2013).
- 6 Contreras, M. *et al.* *Anaplasma phagocytophilum* MSP4 and HSP70 proteins are involved in interactions with host cells during pathogen infection. *Front Cell Infect Microbiol* **7**, 307, doi:10.3389/fcimb.2017.00307 (2017).
- 7 Ojogun, N. *et al.* *Anaplasma phagocytophilum* outer membrane protein A interacts with sialylated glycoproteins to promote infection of mammalian host cells. *Infect Immun* **80**, 3748-3760, doi:10.1128/IAI.00654-12 (2012).
- 8 Mohan Kumar, D. *et al.* Ehrlichia chaffeensis uses its surface protein EtpE to bind GPI-anchored protein DNase X and trigger entry into mammalian cells. *PLoS Pathog* **9**, e1003666, doi:10.1371/journal.ppat.1003666 (2013).
- 9 Teymournejad, O., Lin, M. & Rikihisa, Y. Ehrlichia chaffeensis and Its Invasin EtpE Block Reactive Oxygen Species Generation by Macrophages in a DNase X-Dependent Manner. *mBio* **8**, doi:10.1128/mBio.01551-17 (2017).
- 10 Cheng, Z., Miura, K., Popov, V., Kumagai, Y. & Rikihisa, Y. Insights into the CtrA regulon in development of stress resistance in obligatory intracellular pathogen Ehrlichia chaffeensis. *Mol Microbiol* **82**, 1217-1234, doi:10.1111/j.1365-2958.2011.07885.x (2011).
- 11 Long, S. *et al.* Antigenic variation of Ehrlichia chaffeensis resulting from differential expression of the 28-kilodalton protein gene family. *Infect Immun* **70**, 1824-1831, doi:10.1128/iai.70.4.1824-1831.2002 (2002).
- 12 Farris, T., Dunphy, P., Zhu, B., Kibler, C. & McBride, J. Ehrlichia chaffeensis TRP32 is a Nucleomodulin that Directly Regulates Expression of Host Genes Governing Differentiation and Proliferation. *Infect Immun* **84**, 3182-3194, doi:10.1128/IAI.00657-16 (2016).
- 13 Wakeel, A., Kuriakose, J. & McBride, J. An Ehrlichia chaffeensis tandem repeat protein interacts with multiple host targets involved in cell signaling, transcriptional regulation, and vesicle trafficking. *Infect Immun* **77**, 1734-1745, doi:10.1128/IAI.00027-09 (2009).
- 14 Luo, T., Dunphy, P., Lina, T. & McBride, J. Ehrlichia chaffeensis Exploits Canonical and Noncanonical Host Wnt Signaling Pathways To Stimulate Phagocytosis and Promote Intracellular Survival. *Infect Immun* **84**, 686-700, doi:10.1128/IAI.01289-15 (2015).
- 15 Baldo, L., Lo, N. & Werren, J. Mosaic nature of the wolbachia surface protein. *J Bacteriol* **187**, 5406-5418, doi:10.1128/JB.187.15.5406-5418.2005 (2005).
- 16 Vellaiswamy, M. *et al.* Characterization of rickettsial adhesin Adr2 belonging to a new group of adhesins in  $\alpha$ -proteobacteria. *Microb Pathog* **50**, 233-242, doi:10.1016/j.micpath.2011.01.009 (2011).
- 17 Reed, S., Lamason, R., Risca, V., Abernathy, E. & Welch, M. Rickettsia actin-based motility occurs in distinct phases mediated by different actin nucleators. *Curr Biol* **24**, 98-103, doi:10.1016/j.cub.2013.11.025 (2014).
- 18 Renvoisé, A., Merhej, V., Georgiades, K. & Raoult, D. Intracellular Rickettsiales: Insights into manipulators of eukaryotic cells. *Trends Mol Med* **17**, 573-583, doi:10.1016/j.molmed.2011.05.009 (2011).
- 19 Chan, Y., Riley, S. & Martinez, J. Adherence to and invasion of host cells by spotted Fever group rickettsia species. *Front Microbiol* **1**, 139, doi:10.3389/fmicb.2010.00139 (2010).



- 20 Ha, N., Cho, N., Kim, Y., Choi, M. & Kim, I. An autotransporter protein from *Orientia tsutsugamushi* mediates adherence to nonphagocytic host cells. *Infect Immun* **79**, 1718-1727, doi:10.1128/IAI.01239-10 (2011).
- 21 Ohashi, N., Tamura, A. & Suto, T. Immunoblotting analysis of anti-rickettsial antibodies produced in patients of Tsutsugamushi disease. *Microbiol Immunol* **32**, 1085-1092 (1988).
- 22 Kim, G. *et al.* Diversification of *Orientia tsutsugamushi* genotypes by intragenic recombination and their potential expansion in endemic areas. *PLoS Negl Trop Dis* **11**, e0005408, doi:10.1371/journal.pntd.0005408 (2017).
